# Supplementary material for: Long-Term Apparent Temperature, Extreme Temperature Exposure, and Depressive Symptoms: A Longitudinal Study in China
Source: MDPI journal article supplement (doi:10.3390/ijerph20043229), 2023-02-12
Supplement: s1 [file s1]

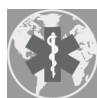

# Supplemental Materials:

## Long-term apparent temperature, extreme temperature exposure and depressive symptoms: A longitudinal study in China

Jianbo Jin, Zhihu Xu, Ru Cao, Yuxin Wang, Qiang Zeng, Xiaochuan Pan, Jing Huang, Guoxing Li

### Contents

#### Appendix method

Figure S1. Flowchart of the study samples.

Figure S2. Cross-validation for the monthly estimates of apparent temperature (2011-2018) in China

Figure S3. Conceptual causal pathway is shown as directed acyclic graph (DAG)

Figure S4. Hazards ratios of depressive symptoms each percent increase of annual change of ice days by baseline characteristics

Figure S5. Hazards ratios of depressive symptoms each percent increase of annual change of cool nights by baseline characteristics

Figure S6. Hazards ratios of depressive symptoms each percent increase of annual change of cool days by baseline characteristics

Figure S7. Hazards ratios of depressive symptoms each percent increase of annual change of cool duration by baseline characteristics

Figure S8. The exposure-response curve of long-term ambient temperature exposure and depressive symptoms.

Table S1. Definition of extreme temperature indicators.

Table S2. Index table of the variables.

Table S3. Summary statistics on population characteristics (N=17,596).

Table S4. The associations between temperature and depressive symptoms in sensitive analysis, by using 12 scores as a cut-off of depressive symptoms, or 2-year moving average apparent temperature before survey time.

## Appendix method

### The Center for Epidemiologic Studies Depression Scale (CES-D10)

Respondents were asked how frequently in the last week they: were bothered by things; had trouble concentrating on things; felt depressed; felt everything was an effort; felt hopeful about future; felt fearful; had restless sleep; was happy; felt lonely; and could not get going. After reverse scoring the two positively worded items, we assigned a score from 0 to 3 for each item as follows: 0 for 0 days, 1 for 1–2 days; 2 for 3–4 days; 3 for 5–7 days. Scores of these 10 items were summed to create an additive scale score ranging from 0 to 30, with higher scores indicating more depressive symptoms.

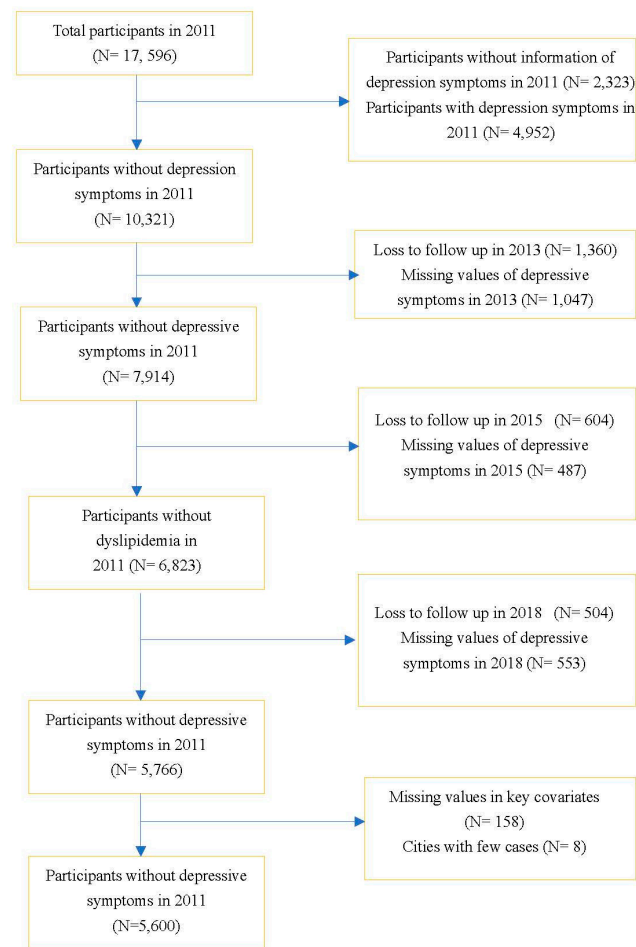

**Figure S1.** Flowchart of the study samples.

Two cities, Shenzhen (subjects:4; incidence: 0.20) and Lanzhou (subjects: 4; incidence :0.33), were excluded for potential impact on the distribution of samples (average number of subjects: 45.16; average incidence: 0.03)

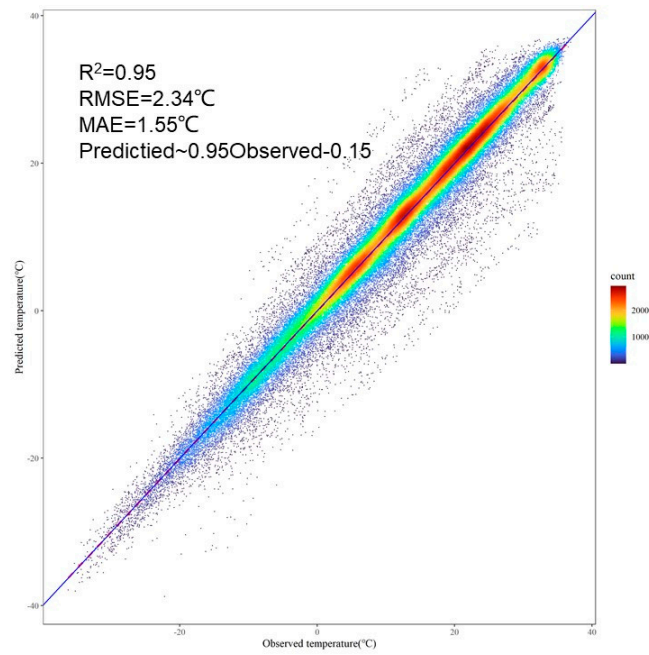

**Figure S2.** Cross-validation for the monthly estimates of apparent temperature (2011-2018) in China.

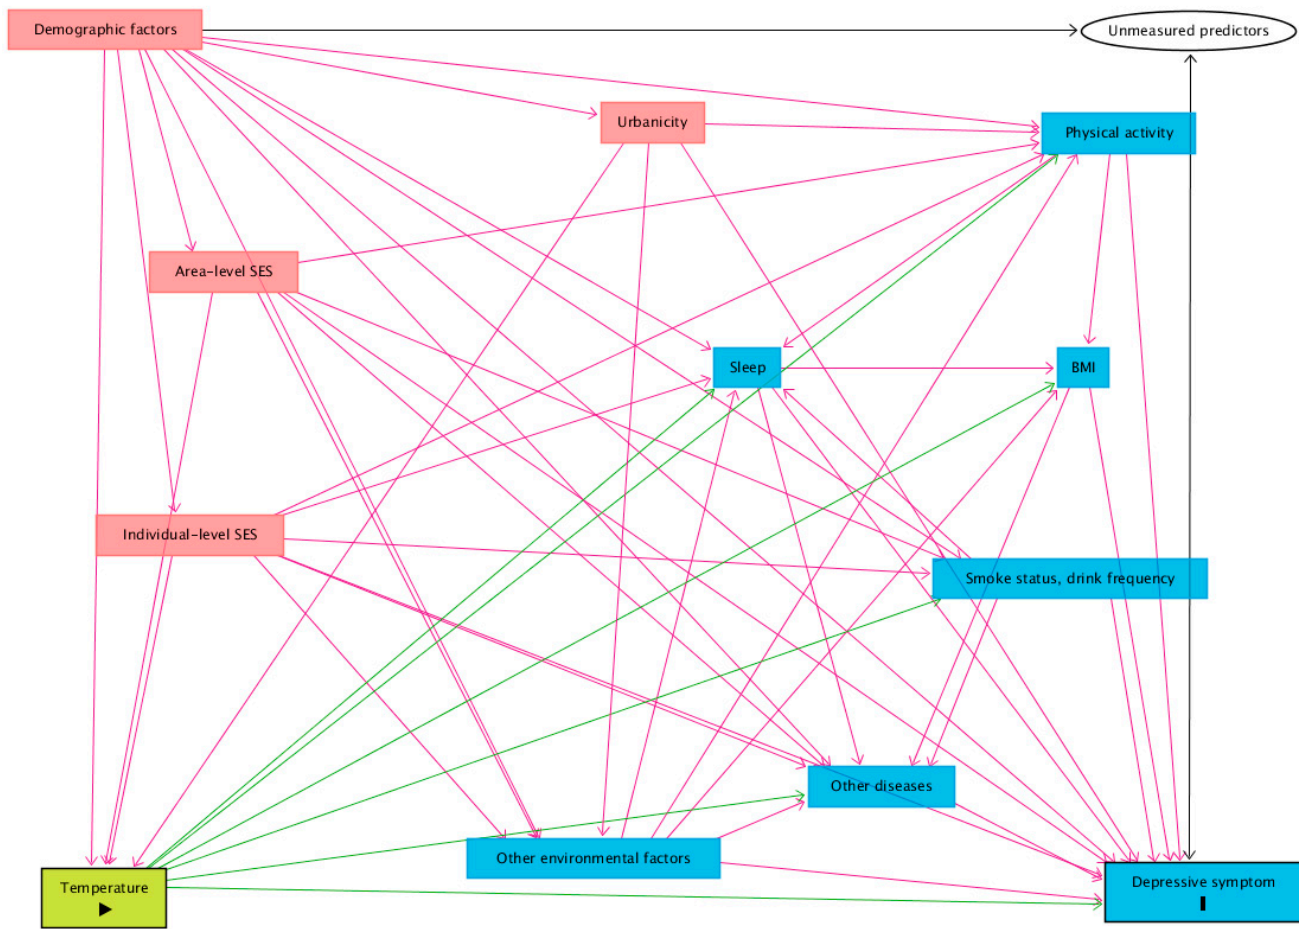

**Figure S3.** Conceptual causal pathway is shown as directed acyclic graph (DAG).

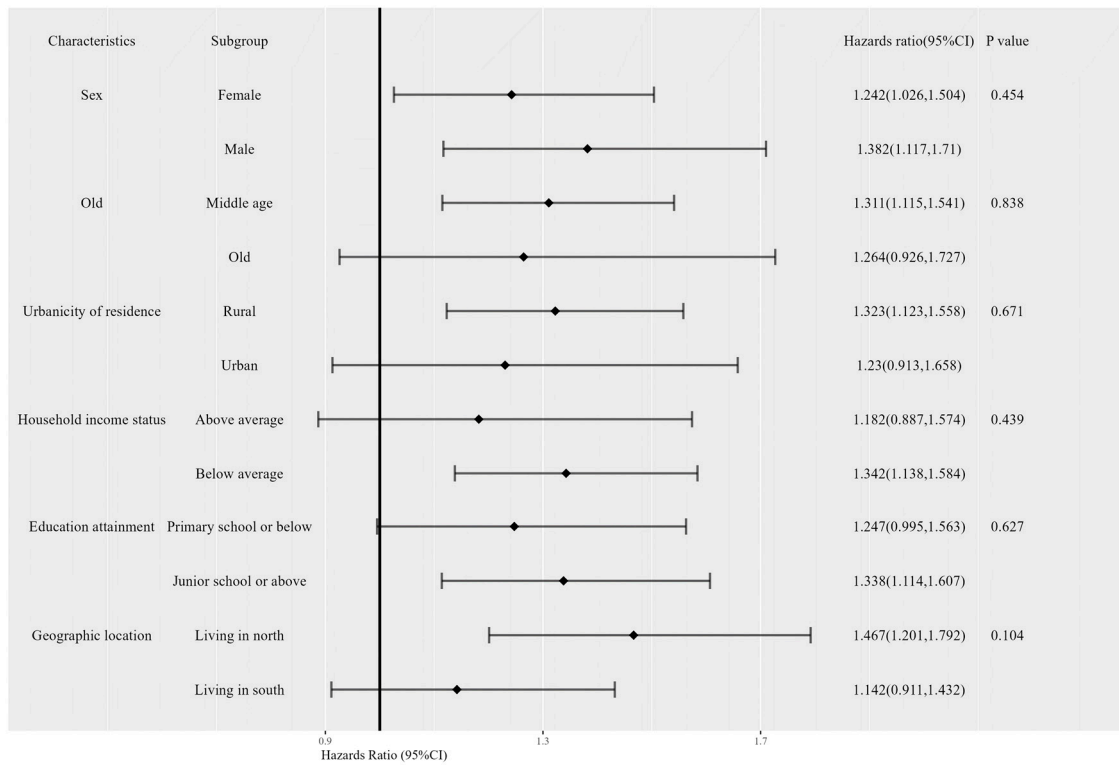

**Figure S4.** Hazards ratios of depressive symptoms each percent increase of annual change of ice days by baseline characteristics

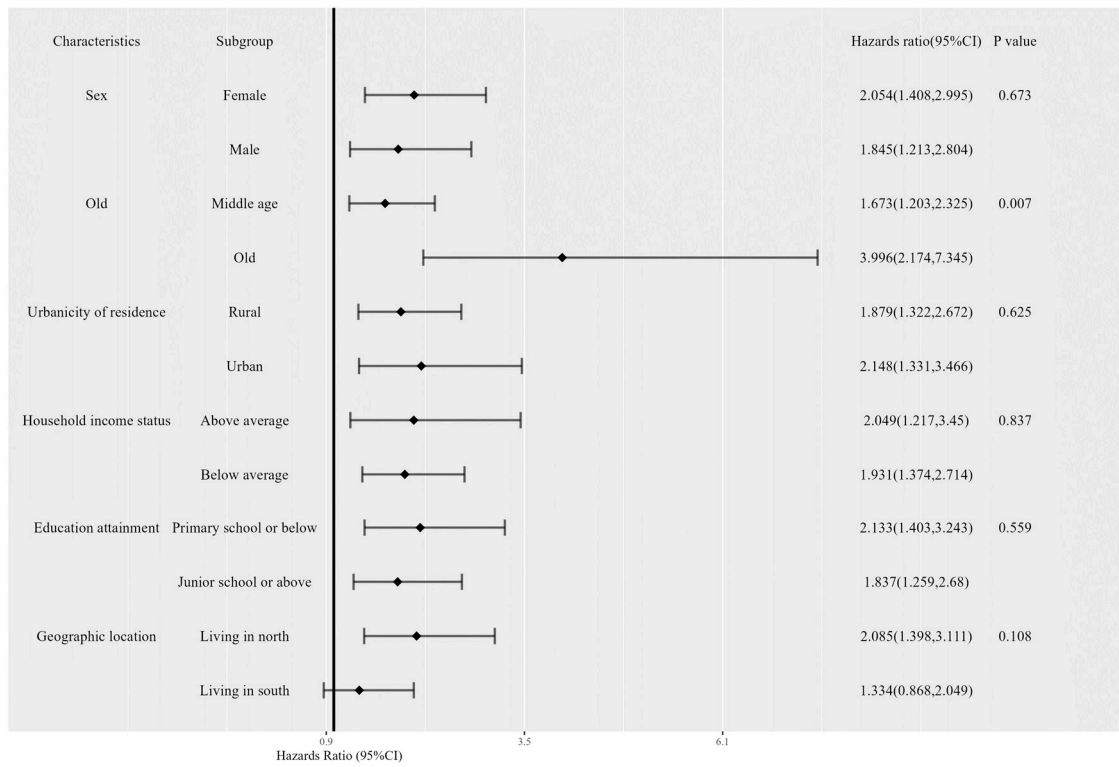

**Figure S5.** Hazards ratios of depressive symptoms each percent increase of annual change of cool nights by baseline characteristics

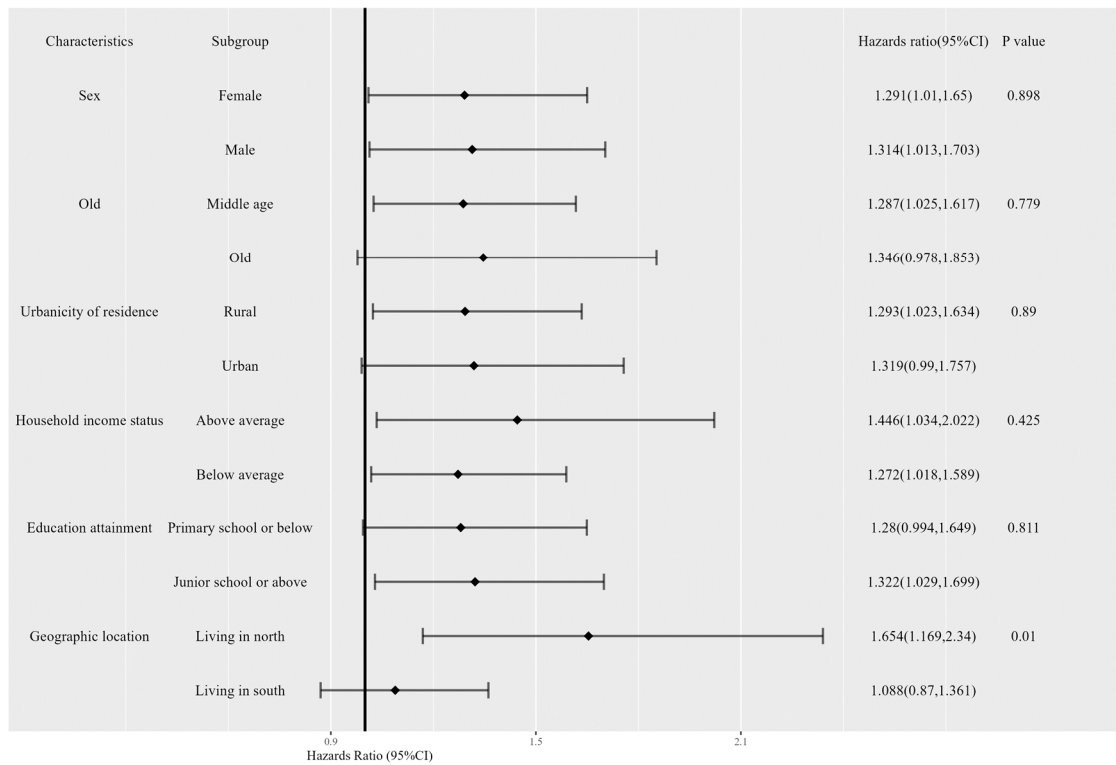

**Figure S6.** Hazards ratios of depressive symptoms each percent increase of annual change of cool days by baseline characteristics



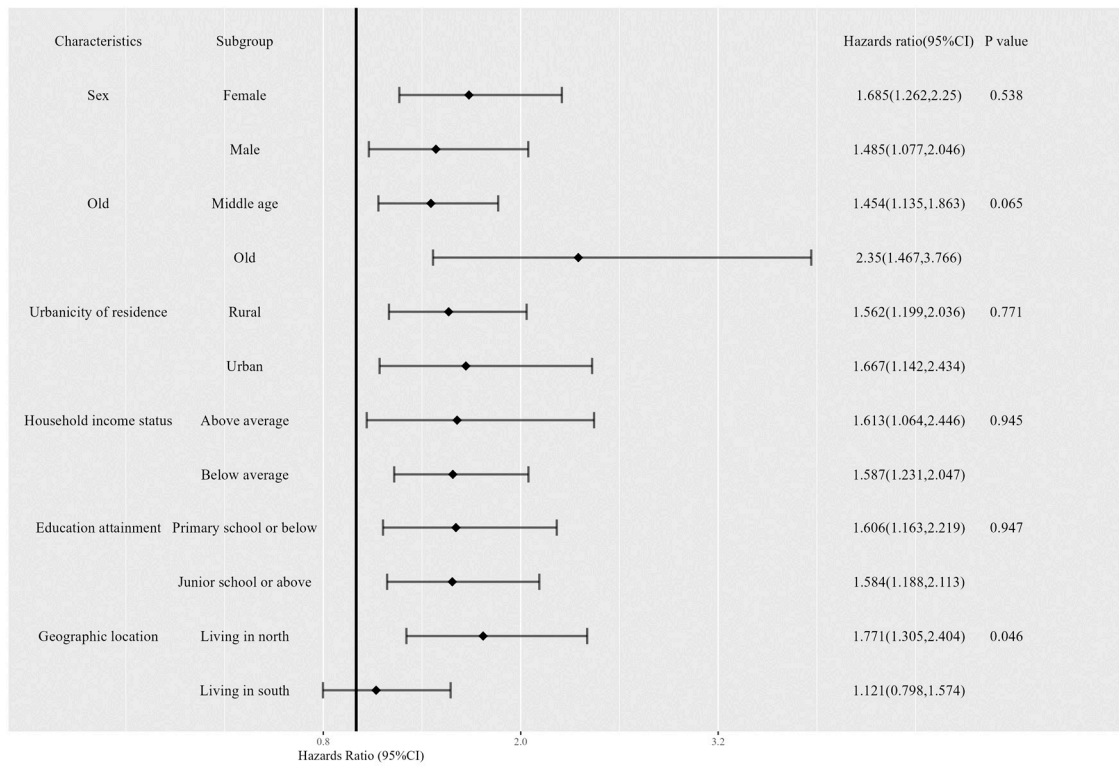

**Figure S7.** Hazards ratios of depressive symptoms each percent increase of annual change of cool duration by baseline characteristics

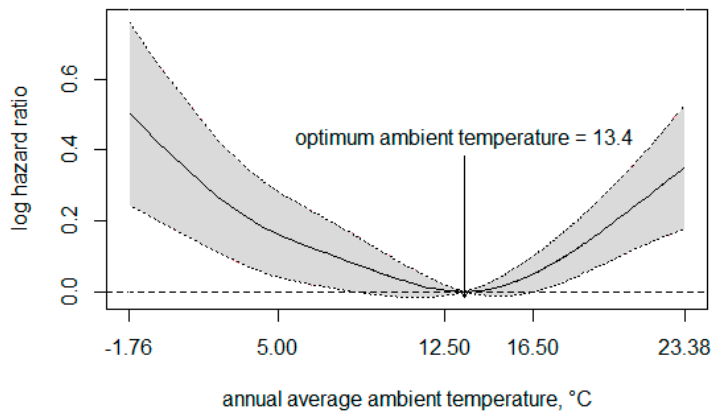

Figure S8. The exposure-response curve of long-term ambient temperature exposure and depressive symptoms. Age, sex, marriage status, household income, education attainment, urbanicity of residence, gross domestic product (GDP), and annual average sunlight hours were adjusted. The solid line represents log hazard ratio, and gray zone indicates 95% confidence interval.

**Table S1.** Definition of extreme temperature indicators

| Name                           | Definition                                                           | Unit |
|--------------------------------|----------------------------------------------------------------------|------|
| <b>Extreme hot indicators</b>  |                                                                      |      |
| Tropical nights                | Daily minimum temperature > 20 °C                                    | Days |
| Summer days                    | Daily maximum temperature > 25 °C                                    | Days |
| Warm nights                    | Daily minimum temperature > 90th percentile                          | Days |
| Warm days                      | Daily maximum temperature > 90th percentile                          | Days |
| Warm spell duration            | Daily maximum temperature > 90th percentile for ≥ 2 consecutive days | Days |
| <b>Extreme cold indicators</b> |                                                                      |      |
| Frost nights                   | Daily minimum temperature < 0 °C                                     | Days |
| Ice days                       | Daily maximum temperature < 0 °C                                     | Days |
| Cool nights                    | Daily minimum temperature < 10th percentile                          | Days |
| Cool days                      | Daily maximum temperature < 10th percentile                          | Days |
| Cold spell duration            | Daily minimum temperature < 10th percentile for ≥ 2 consecutive days | Days |

Notes: 10th/90th percentile was calculated as the calendar day 10th/90th percentile of the daily temperature distribution in the period of 2010–2018 for each city

**Table S2. Index table of the variables.**

| Variable name                     | Definition                                                         |
|-----------------------------------|--------------------------------------------------------------------|
| <b>Individual-level variables</b> |                                                                    |
| Age                               | Unit: years                                                        |
| gender                            | Female = 0, male = 1                                               |
| Marriage status                   | Single = 0, married = 1                                            |
| Education attainment              | Primary school or lower = 0, Higher than primary school = 1        |
| Urbanicity                        | Rural residence = 0, Urban residence = 1                           |
| Household income                  | Unit: yuan                                                         |
| <b>Area-level variables</b>       |                                                                    |
| Geographic location               | Living in the northern China = 0, Living in the southern China = 1 |
| City level GDP                    | Unit: million yuan                                                 |
| <b>Meteorological variables</b>   |                                                                    |
| Apparent temperature              | Unit: °C                                                           |
| Ambient temperature               | Unit: °C                                                           |
| Relative humidity                 | Unit: %                                                            |
| Sunlight                          | Unit: hours/day                                                    |
| <b>Extreme hot indicators</b>     |                                                                    |
| Tropical nights                   | Unit: days                                                         |
| Summer days                       | Unit: days                                                         |
| Warm nights                       | Unit: days                                                         |
| Warm days                         | Unit: days                                                         |
| Warm spell duration               | Unit: days                                                         |
| <b>Extreme cold indicators</b>    |                                                                    |
| Frost nights                      | Unit: days                                                         |
| Ice days                          | Unit: days                                                         |
| Cool nights                       | Unit: days                                                         |

---

Cool days

Unit: days

Cold spell duration

Unit: days

---

Abbreviation: GDP = gross domestic product.

**Table S3.** Summary statistics on population characteristics (N=17,596)

| Characteristics                                    | Included               | Excluded               | Total                  |
|----------------------------------------------------|------------------------|------------------------|------------------------|
| <b>Subjects</b>                                    | 5600                   | 11996                  | 17596                  |
| <b>Individual-level variables</b>                  |                        |                        |                        |
| Age (mean (SD)), yr                                | 57.18 (8.23)           | 59.92 (10.82)          | 59.05 (10.15)          |
| Sex = Male                                         | 2936 (52.4%)           | 5493 (45.8%)           | 8429 (47.9%)           |
| Marriage status = Married                          | 5191 (92.7%)           | 10199 (85.1%)          | 15390 (87.5%)          |
| Education attainment = Higher than primary school  | 2279 (40.7%)           | 3595 (30.0%)           | 5874 (33.4%)           |
| Urbanicity = Urban residence                       | 2223 (39.7%)           | 4874 (40.6%)           | 7097 (40.3%)           |
| Household income (mean (SD)), yuan                 | 14872.01<br>(28432.06) | 14826.25<br>(33401.62) | 14840.96<br>(31888.18) |
| <b>Area-level variables</b>                        |                        |                        |                        |
| Geographic location = Living in the southern China | 2930 (52.3%)           | 7123 (59.4%)           | 10053 (57.1%)          |
| City level GDP (mean (SD)), million yuan           | 18.43 (21.44)          | 18.74 (24.12)          | 18.64 (23.30)          |
| <b>Meteorological variables</b>                    |                        |                        |                        |
| Apparent temperature (mean (SD)), °C               | 12.75 (6.03)           | 13.22 (6.35)           | 13.07 (6.25)           |
| Ambient temperature (mean (SD)), °C                | 137.29 (47.46)         | 140.82 (49.65)         | 139.69 (48.99)         |
| Relative humidity (mean (SD)), %                   | 66.49 (7.16)           | 67.51 (7.28)           | 67.19 (7.26)           |
| Sunlight (mean (SD)), hours/day                    | 50.92 (10.76)          | 49.85 (11.10)          | 50.19 (11.00)          |
| <b>Extreme hot indicators</b>                      |                        |                        |                        |
| Tropical nights (mean (SD)), days                  | 76.30 (49.65)          | 80.20 (53.11)          | 78.96 (52.06)          |
| Summer days (mean (SD)), days                      | 131.48 (41.57)         | 134.74 (43.98)         | 133.70 (43.25)         |
| Warm nights (mean (SD)), days                      | 31.13 (7.53)           | 31.47 (7.39)           | 31.36 (7.44)           |
| Warm days (mean (SD)), days                        | 34.89 (9.40)           | 36.42 (9.85)           | 35.93 (9.74)           |
| Warm spell duration (mean (SD)), days              | 30.08 (10.33)          | 31.86 (10.68)          | 31.29 (10.61)          |
| <b>Extreme cold indicators</b>                     |                        |                        |                        |
| Frost nights (mean (SD)), days                     | 73.92 (58.36)          | 68.37 (60.42)          | 70.14 (59.82)          |

---

|                                       |               |               |               |
|---------------------------------------|---------------|---------------|---------------|
| Ice days (mean (SD)), days            | 20.95 (34.13) | 19.79 (34.25) | 20.16 (34.21) |
| Cool nights (mean (SD)), days         | 48.81 (6.00)  | 49.23 (6.02)  | 49.10 (6.01)  |
| Cool days (mean (SD)), days           | 51.24 (5.56)  | 51.76 (5.72)  | 51.59 (5.68)  |
| Cold spell duration (mean (SD)), days | 45.35 (6.22)  | 45.72 (6.32)  | 45.61 (6.29)  |

---

Note: yr = years; SD = standard difference; GDP = gross domestic product.

**Table S4.** The associations between temperature and depressive symptoms in sensitive analysis, by using 12 scores as a cut-off of depressive symptoms, or 2-year moving average apparent temperature before survey time.

| Variable                    | Sensitive analysis <sup>a</sup> |                | Sensitive analysis <sup>b</sup> |                |
|-----------------------------|---------------------------------|----------------|---------------------------------|----------------|
|                             | Hazard Ratio (95% CI)           | <i>P</i> value | Hazard Ratio (95% CI)           | <i>P</i> value |
| <b>Apparent temperature</b> |                                 |                |                                 |                |
| High temperature            | 1.019(1.001-1.037)              | 0.04           | 1.026(1.012-1.04)               | <0.001         |
| Low temperature             | 1.028(1.016-1.04)               | <0.001         | 1.023(1.011-1.035)              | <0.001         |
| <b>Extreme hot</b>          |                                 |                |                                 |                |
| Tropical nights             | 1.259(1.085-1.461)              | 0.002          | 1.25(1.077-1.451)               | 0.003          |
| Summer days                 | 0.506(0.235-1.087)              | 0.081          | 0.633(0.31-1.295)               | 0.211          |
| Warm nights                 | 0.932(0.797-1.091)              | 0.38           | 1.006(0.868-1.164)              | 0.941          |
| Warm days                   | 0.793(0.636-0.988)              | 0.039          | 0.838(0.683-1.029)              | 0.091          |
| Warm spell duration         | 0.828(0.695-0.987)              | 0.035          | 0.866(0.737-1.017)              | 0.08           |
| <b>Extreme cold</b>         |                                 |                |                                 |                |
| Frost nights                | 1.148(0.985-1.338)              | 0.078          | 1.161(1.004-1.342)              | 0.043          |
| Ice days                    | 1.386(1.188-1.617)              | <0.001         | 1.236(1.071-1.427)              | 0.004          |
| Cool nights                 | 1.97(1.481-2.621)               | <0.001         | 1.924(1.465-2.527)              | <0.001         |
| Cool days                   | 1.172(0.951-1.444)              | 0.136          | 1.218(1.006-1.476)              | 0.044          |
| Cold spell duration         | 1.51(1.255-1.819)               | <0.001         | 1.503(1.253-1.803)              | <0.001         |

Sensitive analysis <sup>a</sup>: Using 12 scores of CEDS-10 as the cut-off of depressive symptoms. Adjusted for model 3 criteria.

Sensitive analysis <sup>b</sup>: Using the 2-year moving average apparent temperature of the year before each survey as the temperature exposure.
